# Supplementary material
Source: HighWire-hosted journal article supplement (https://jnis.bmj.com/content/9/12/1197)
Supplement: inline-supplementary-material-2 [file inline-supplementary-material-2.docx]

**APPENDIX 2: Studies included in Meta-Analysis**

1. Akgul E, Aksungur E, Balli T, Onan B, Yilmaz DM, Bicakci S, et al. Y-stent-assisted coil embolization of wide-neck intracranial aneurysms. A single center experience. Interv Neuroradiol. 2011;17(1):36-48.

2. Akpek S, Arat A, Morsi H, Klucznick RP, Strother CM, Mawad ME. Self-expandable stent-assisted coiling of wide-necked intracranial aneurysms: a single-center experience. AJNR Am J Neuroradiol. 2005;26(5):1223-31.

3. Alurkar A, Karanam LS, Nayak S, Oak S. Stent-assisted coiling in ruptured wide-necked aneurysms: A single-center analysis. Surg Neurol Int. 2012;3:131.

4. Amenta PS, Dalyai RT, Kung D, Toporowski A, Chandela S, Hasan D, et al. Stent-assisted coiling of wide-necked aneurysms in the setting of acute subarachnoid hemorrhage: experience in 65 patients. Neurosurgery. 2012;70(6):1415-29; discussion 29.

5. Andaluz N, Zuccarello M. Anterior Communicating Artery Aneurysm Surgery through the Orbitopterional Approach: Long-Term Follow-Up in a Series of 75 Consecutive Patients. Skull Base. 2008;18(4):265-74.

6. Baldi S, Mounayer C, Piotin M, Spelle L, Moret J. Balloon-assisted coil placement in wide-neck bifurcation aneurysms by use of a new, compliant balloon microcatheter. AJNR Am J Neuroradiol. 2003;24(6):1222-5.

7. Birknes JK, Hwang SK, Pandey AS, Cockroft K, Dyer AM, Benitez RP, et al. Feasibility and limitations of endovascular coil embolization of anterior communicating artery aneurysms: morphological considerations. Neurosurgery. 2006;59(1):43-52; discussion 43-52.

8. Blackburn SL, Kadkhodayan Y, Shekhtman E, Derdeyn CP, Cross DT, 3rd, Moran CJ. Treatment of basilar tip aneurysms with horizontal PCA to PCA stent-assisted coiling: case series. J Neurointerv Surg. 2013;5(3):212-6.

9. Bracard S, Abdel-Kerim A, Thuillier L, Klein O, Anxionnat R, Finitsis S, et al. Endovascular coil occlusion of 152 middle cerebral artery aneurysms: initial and midterm angiographic and clinical results. J Neurosurg. 2010;112(4):703-8.

10. Brasiliense LB, Yoon JW, Orina JN, Miller DA, Tawk RG, Hanel RA. A Reappraisal of Anterior Communicating Artery Aneurysms: A Case for Stent-Assisted Embolization. Neurosurgery. 2016;78(2):200-7.

11. Chalouhi N, Jabbour P, Gonzalez LF, Dumont AS, Rosenwasser R, Starke RM, et al. Safety and efficacy of endovascular treatment of basilar tip aneurysms by coiling with and without stent assistance: a review of 235 cases. Neurosurgery. 2012;71(4):785-94.

12. Cherian MP, Pranesh MB, Mehta P, Vijayan K, Baskar P, Kalyanpur TM, et al. Outcomes of endovascular coiling of anterior communicating artery aneurysms in the early post-rupture period: a prospective analysis. Neurol India. 2011;59(2):218-23.

13. Cho YD, Rhim JK, Park JJ, Jeon JP, Kang HS, Kim JE, et al. Modified coil protection for proper coil frame configuration in wide-necked aneurysms. Neuroradiology. 2015;57(7):705-11.

14. Choi JH, Park JE, Kim MJ, Kim BS, Shin YS. Aneurysmal Neck Clipping as the Primary Treatment Option for Both Ruptured and Unruptured Middle Cerebral Artery Aneurysms. J Korean Neurosurg Soc. 2016;59(3):269-75.

15. Dammann P, Schoemberg T, Muller O, Ozkan N, Schlamann M, Wanke I, et al. Outcome for unruptured middle cerebral artery aneurysm treatment: surgical and endovascular approach in a single center. Neurosurg Rev. 2014;37(4):643-51.

16. De Keukeleire K, Vanlangenhove P, Defreyne L. Evaluation of a neck-bridge device to assist endovascular treatment of wide-neck aneurysms of the anterior circulation. AJNR Am J Neuroradiol. 2008;29(1):73-8.

17. Eboli P, Ryan RW, Alexander JE, Alexander MJ. Evolving role of endovascular treatment for MCA bifurcation aneurysms: case series of 184 aneurysms and review of the literature. Neurol Res. 2014;36(4):332-8.

18. Fields JD, Brambrink L, Dogan A, Helseth EK, Liu KC, Lee DS, et al. Stent assisted coil embolization of unruptured middle cerebral artery aneurysms. J Neurointerv Surg. 2013;5(1):15-9.

19. Fleiss J. Review papers: The statistical basis of meta-analysis. Statistical methods in medical research. 1993;2(2):121-45.

20. Galal A, Bahrassa F, Dalfino JC, Boulos AS. Stent-assisted treatment of unruptured and ruptured intracranial aneurysms: clinical and angiographic outcome. Br J Neurosurg. 2013;27(5):607-16.

21. Gentric JC, Biondi A, Piotin M, Mounayer C, Lobotesis K, Bonafe A, et al. Balloon remodeling may improve angiographic results of stent-assisted coiling of unruptured intracranial aneurysms. Neurosurgery. 2015;76(4):441-5; discussion 5.

22. Golshani K, Ferrel A, Lessne M, Shah P, Chowdhary A, Choulakian A, et al. Stent-assisted coil emboilization of ruptured intracranial aneurysms: A retrospective multicenter review. Surg Neurol Int. 2012;3:84.

23. Gonzalez N, Sedrak M, Martin N, Vinuela F. Impact of anatomic features in the endovascular embolization of 181 anterior communicating artery aneurysms. Stroke. 2008;39(10):2776-82.

24. Gupta SK, Khosla VK, Chhabra R, Mohindra S, Bapuraj JR, Khandelwal N, et al. Internal carotid artery bifurcation aneurysms: surgical experience. Neurol Med Chir (Tokyo). 2007;47(4):153-7; discussion 7-8.

25. Henkes H, Fischer S, Mariushi W, Weber W, Liebig T, Miloslavski E, et al. Angiographic and clinical results in 316 coil-treated basilar artery bifurcation aneurysms. J Neurosurg. 2005;103(6):990-9.

26. Hetts SW, Turk A, English JD, Dowd CF, Mocco J, Prestigiacomo C, et al. Stent-assisted coiling versus coiling alone in unruptured intracranial aneurysms in the matrix and platinum science trial: safety, efficacy, and mid-term outcomes. AJNR Am J Neuroradiol. 2014;35(4):698-705.

27. Hong B, Patel NV, Gounis MJ, DeLeo MJ, 3rd, Linfante I, Wojak JC, et al. Semi-jailing technique for coil embolization of complex, wide-necked intracranial aneurysms. Neurosurgery. 2009;65(6):1131-8; discussion 8-9.

28. Horowitz M, Gupta R, Gologorsky Y, Jovin T, Genevro J, Levy E, et al. Clinical and anatomic outcomes after endovascular coiling of middle cerebral artery aneurysms: report on 30 treated aneurysms and review of the literature. Surg Neurol. 2006;66(2):167-71; discussion 71.

29. Huang Q, Xu Y, Hong B, Zhao R, Zhao W, Liu J. Stent-assisted embolization of wide-neck anterior communicating artery aneurysms: review of 21 consecutive cases. AJNR Am J Neuroradiol. 2009;30(8):1502-6.

30. Iijima A, Piotin M, Mounayer C, Spelle L, Weill A, Moret J. Endovascular treatment with coils of 149 middle cerebral artery berry aneurysms. Radiology. 2005;237(2):611-9.

31. Jin SC, Kwon OK, Oh CW, Bang JS, Hwang G, Park NM, et al. Simple coiling using single or multiple catheters without balloons or stents in middle cerebral artery bifurcation aneurysms. Neuroradiology. 2013;55(3):321-6.

32. Jin S-C, Ahn JS, Kwun B-D, Kwon D-H. Analysis of clinical and radiological outcomes in microsurgical and endovascular treatment of basilar apex aneurysms. Journal of Korean Neurosurgical Society. 2009;45(4):224-30.

33. Johnson AK, Munich SA, Heiferman DM, Lopes DK. Stent assisted embolization of 64 anterior communicating artery aneurysms. J Neurointerv Surg. 2013;5 Suppl 3:iii62-5.

34. Kawanabe Y, Sadato A, Taki W, Hashimoto N. Endovascular occlusion of intracranial aneurysms with Guglielmi detachable coils: correlation between coil packing density and coil compaction. Acta Neurochir (Wien). 2001;143(5):451-5.

35. Kuhn AL, Hou SY, Puri AS, Silva CF, Gounis MJ, Wakhloo AK. Stent-assisted coil embolization of aneurysms with small parent vessels: safety and efficacy analysis. J Neurointerv Surg. 2016;8(6):581-5.

36. Kwon BJ, Seo DH, Ha YS, Lee KC. Endovascular Treatment of Wide-necked Cerebral Aneurysms with an Acute Angle Branch Incorporated into the Sac: Novel methods of Branch Access in 8 Aneurysms. Neurointervention. 2012;7(2):93-101.

37. Lai LT, Gragnaniello C, Morgan MK. Outcomes for a case series of unruptured anterior communicating artery aneurysm surgery. J Clin Neurosci. 2013;20(12):1688-92.

38. Lawton MT. Basilar apex aneurysms: surgical results and perspectives from an initial experience. Neurosurgery. 2002;50(1):1-8; discussion -10.

39. Lee JH, Ko JK, Lee SW, Lee TH, Choi CH. Coiling of Middle Cerebral Artery Bifurcation Aneurysms: Clinical and Angiographic Outcomes. Korean Journal of Cerebrovascular Surgery. 2008;10(3):411-8.

40. Lee WJ, Cho CS. Y-stenting endovascular treatment for ruptured intracranial aneurysms : a single-institution experience in Korea. J Korean Neurosurg Soc. 2012;52(3):187-92.

41. Li JW, Shi CH. Endovascular treatment of complicated ruptured anterior communicating artery aneurysms based on the anatomical features of the anterior communicating artery complex. Neurol India. 2012;60(1):55-60.

42. Liu W, Kung DK, Policeni B, Rossen JD, Jabbour PM, Hasan DM. Stent-assisted coil embolization of complex wide-necked bifurcation cerebral aneurysms using the "waffle cone" technique. A review of ten consecutive cases. Interv Neuroradiol. 2012;18(1):20-8.

43. Lodi YM, Latorre JG, El-Zammar Z, Swarnkar A, Deshaies E, Fessler RD. Stent assisted coiling of the ruptured wide necked intracranial aneurysm. J Neurointerv Surg. 2012;4(4):281-6.

44. Lozier AP, Kim GH, Sciacca RR, Connolly ES, Jr., Solomon RA. Microsurgical treatment of basilar apex aneurysms: perioperative and long-term clinical outcome. Neurosurgery. 2004;54(2):286-96; discussion 96-9.

45. Lubicz B, Graca J, Levivier M, Lefranc F, Dewitte O, Pirotte B, et al. Endovascular treatment of middle cerebral artery aneurysms. Neurocrit Care. 2006;5(2):93-101.

46. Machi P, Costalat V, Lobotesis K, Ruiz C, Cheikh YB, Eker O, et al. LEO Baby Stent Use following Balloon-Assisted Coiling: Single- and Dual-Stent Technique--Immediate and Midterm Results of 29 Consecutive Patients. AJNR Am J Neuroradiol. 2015;36(11):2096-103.

47. McDougall CG, Johnston SC, Gholkar A, Barnwell SL, Vazquez Suarez JC, Masso Romero J, et al. Bioactive versus bare platinum coils in the treatment of intracranial aneurysms: the MAPS (Matrix and Platinum Science) trial. AJNR Am J Neuroradiol. 2014;35(5):935-42.

48. McDougall CG, Spetzler RF, Zabramski JM, Partovi S, Hills NK, Nakaji P, et al. The Barrow Ruptured Aneurysm Trial. J Neurosurg. 2012;116(1):135-44.

49. Molyneux A. Cerecyte Coil Trial Subset Data - Wide Neck Aneurysms. In: Medical S, editor. Conversations and emails with Sequent Medical ed2013.

50. Molyneux A. ISAT Subset Data - Wide Neck Aneurysms. In: Medical S, editor. 2014.

51. Molyneux A, Kerr R, Birks J. Barrow ruptured aneurysm trial. J Neurosurg. 2013;119(1):139-41.

52. Molyneux AJ, Clarke A, Sneade M, Mehta Z, Coley S, Roy D, et al. Cerecyte coil trial: angiographic outcomes of a prospective randomized trial comparing endovascular coiling of cerebral aneurysms with either cerecyte or bare platinum coils. Stroke. 2012;43(10):2544-50.

53. Moon K, Levitt MR, Almefty RO, Nakaji P, Albuquerque FC, Zabramski JM, et al. Treatment of Ruptured Anterior Communicating Artery Aneurysms: Equipoise in the Endovascular Era? Neurosurgery. 2015;77(4):566-71; discussion 71.

54. Mordasini P, Schroth G, Guzman R, Barth A, Seiler RW, Remonda L. Endovascular treatment of posterior circulation cerebral aneurysms by using Guglielmi detachable coils: a 10-year single-center experience with special regard to technical development. AJNR Am J Neuroradiol. 2005;26(7):1732-8.

55. Mortimer AM, Bradley MD, Mews P, Molyneux AJ, Renowden SA. Endovascular treatment of 300 consecutive middle cerebral artery aneurysms: clinical and radiologic outcomes. AJNR Am J Neuroradiol. 2014;35(4):706-14.

56. Nanda A, Sonig A, Banerjee AD, Javalkar VK. Microsurgical management of basilar artery apex aneurysms: a single surgeon's experience from Louisiana State University, Shreveport. World Neurosurg. 2014;82(1-2):118-29.

57. Pandey AS, Koebbe C, Rosenwasser RH, Veznedaroglu E. Endovascular coil embolization of ruptured and unruptured posterior circulation aneurysms: review of a 10-year experience. Neurosurgery. 2007;60(4):626-36; discussion 36-7.

58. Peluso JP, van Rooij WJ, Sluzewski M, Beute GN. A new self-expandable nitinol stent for the treatment of wide-neck aneurysms: initial clinical experience. AJNR Am J Neuroradiol. 2008;29(7):1405-8.

59. Peluso JP, van Rooij WJ, Sluzewski M, Beute GN. Coiling of basilar tip aneurysms: results in 154 consecutive patients with emphasis on recurrent haemorrhage and re-treatment during mid- and long-term follow-up. J Neurol Neurosurg Psychiatry. 2008;79(6):706-11.

60. Petraglia AL, Srinivasan V, Moravan MJ, Coriddi M, Jahromi BS, Vates GE, et al. Unilateral subfrontal approach to anterior communicating artery aneurysms: A review of 28 patients. Surgical neurology international. 2010;2:124-.

61. Quadros RS, Gallas S, Noudel R, Rousseaux P, Pierot L. Endovascular treatment of middle cerebral artery aneurysms as first option: a single center experience of 92 aneurysms. AJNR Am J Neuroradiol. 2007;28(8):1567-72.

62. Raymond J, Guilbert F, Roy D. Neck-bridge device for endovascular treatment of wide-neck bifurcation aneurysms: initial experience. Radiology. 2001;221(2):318-26.

63. Rodriguez-Hernandez A, Sughrue ME, Akhavan S, Habdank-Kolaczkowski J, Lawton MT. Current management of middle cerebral artery aneurysms: surgical results with a "clip first" policy. Neurosurgery. 2013;72(3):415-27.

64. Samson D, Batjer HH, Kopitnik TA, Jr. Current results of the surgical management of aneurysms of the basilar apex. Neurosurgery. 1999;44(4):697-702; discussion -4.

65. Sekhar LN, Tariq F, Morton RP, Ghodke B, Hallam DK, Barber J, et al. Basilar tip aneurysms: a microsurgical and endovascular contemporary series of 100 patients. Neurosurgery. 2013;72(2):284-98; discussion 98-9.

66. Spetzler RF, McDougall CG, Albuquerque FC, Zabramski JM, Hills NK, Partovi S, et al. Response. J Neurosurg. 2013;119(1):141-5.

67. Spetzler RF, McDougall CG, Albuquerque FC, Zabramski JM, Hills NK, Partovi S, et al. The Barrow Ruptured Aneurysm Trial: 3-year results. J Neurosurg. 2013;119(1):146-57.

68. Suzuki S, Tateshima S, Jahan R, Duckwiler GR, Murayama Y, Gonzalez NR, et al. Endovascular treatment of middle cerebral artery aneurysms with detachable coils: angiographic and clinical outcomes in 115 consecutive patients. Neurosurgery. 2009;64(5):876-88; discussion 88-9.

69. Taschner CA, Leclerc X, Rachdi H, Barros AM, Pruvo JP. Matrix detachable coils for the endovascular treatment of intracranial aneurysms: analysis of early angiographic and clinical outcomes. Stroke. 2005;36(10):2176-80.

70. Tateshima S, Murayama Y, Gobin YP, Duckwiler GR, Guglielmi G, Vinuela F. Endovascular treatment of basilar tip aneurysms using Guglielmi detachable coils: anatomic and clinical outcomes in 73 patients from a single institution. Neurosurgery. 2000;47(6):1332-9; discussion 9-42.

71. Tureli D, Sabet S, Senol S, Andac N, Donmez H, Geyik S, et al. Stent-assisted coil embolization of challenging intracranial aneurysms: initial and mid-term results with low-profile ACCLINO devices. Acta Neurochir (Wien). 2016;158(8):1545-53.

72. Vallee JN, Aymard A, Vicaut E, Reis M, Merland JJ. Endovascular treatment of basilar tip aneurysms with Guglielmi detachable coils: predictors of immediate and long-term results with multivariate analysis 6-year experience. Radiology. 2003;226(3):867-79.

73. van Dijk JM, Groen RJ, Ter Laan M, Jeltema JR, Mooij JJ, Metzemaekers JD. Surgical clipping as the preferred treatment for aneurysms of the middle cerebral artery. Acta Neurochir (Wien). 2011;153(11):2111-7.

74. van Rooij WJ, Sluzewski M, Beute GN. Internal carotid bifurcation aneurysms: frequency, angiographic anatomy and results of coiling in 50 aneurysms. Neuroradiology. 2008;50(7):583.

75. Vendrell JF, Costalat V, Brunel H, Riquelme C, Bonafe A. Stent-assisted coiling of complex middle cerebral artery aneurysms: initial and midterm results. AJNR Am J Neuroradiol. 2011;32(2):259-63.

76. Vendrell JF, Menjot N, Costalat V, Hoa D, Moritz J, Brunel H, et al. Endovascular treatment of 174 middle cerebral artery aneurysms: clinical outcome and radiologic results at long-term follow-up. Radiology. 2009;253(1):191-8.

77. Weber W, Bendszus M, Kis B, Boulanger T, Solymosi L, Kuhne D. A new self-expanding nitinol stent (Enterprise) for the treatment of wide-necked intracranial aneurysms: initial clinical and angiographic results in 31 aneurysms. Neuroradiology. 2007;49(7):555-61.

78. Xu F, Qin X, Tian Y, Gu Y, Leng B, Song D. Endovascular treatment of complex intracranial aneurysms using intra/extra-aneurysmal stent. Acta Neurochir (Wien). 2011;153(4):923-30.

79. Yang P, Liu J, Huang Q, Zhao W, Hong B, Xu Y, et al. Endovascular treatment of wide-neck middle cerebral artery aneurysms with stents: a review of 16 cases. AJNR Am J Neuroradiol. 2010;31(5):940-6.

80. Yavuz K, Geyik S, Pamuk AG, Koc O, Saatci I, Cekirge HS. Immediate and midterm follow-up results of using an electrodetachable, fully retrievable SOLO stent system in the endovascular coil occlusion of wide-necked cerebral aneurysms. J Neurosurg. 2007;107(1):49-55.

81. Zhang J, Lv X, Yang J, Wu Z. Stent-assisted coil embolization of intracranial aneurysms using Solitaire stent. Neurol India. 2012;60(3):278-82.

82. Zhao X, Li Z, Fang X, Liu J, Wu D, Lai N. Treatment of ruptured middle cerebral artery aneurysms by endovascular approach: a single-center experience. Int J Neurosci. 2016:1-6.

83. Zhou Y, Yang PF, Li Q, Zhao R, Fang YB, Xu Y, et al. Stent placement for complex middle cerebral artery aneurysms. J Stroke Cerebrovasc Dis. 2014;23(6):1447-56.
